# Supplementary material for: Altered Ex Vivo NLRP3 Inflammasome Activation Is Associated with 28-Day Mortality in Septic Patients
Source: MDPI journal article supplement (doi:10.3390/v15122419), 2023-12-13
Supplement: s1 [file s1]

# **Altered ex vivo NLRP3 Inflammasome Activation is Associated with 28-Day Mortality in septic patients**

Rémy Coudereau<sup>1,2</sup>, Guillaume Monneret<sup>1,2</sup>, Anne-Claire Lukaszewicz<sup>2,3</sup>, Bénédicte F Py<sup>4</sup>,  
Laurent Argaud<sup>5</sup>, Martin Cour<sup>5</sup>, Frank Bidar<sup>2,3</sup>, Morgane Gossez<sup>1,4</sup>, Fabienne Venet<sup>1,4\*</sup>

## **Supplementary Material**

| Parameters                                       | COVID-19 (n=15)  | Septic shock (n=17) | Healthy donors (n=15) |
|--------------------------------------------------|------------------|---------------------|-----------------------|
| Age at admission (years)                         | 64 [51-71]       | 65 [61-69]          | 44 [33-55]            |
| Gender - Male <i>n</i> (%)                       | 11 (73)          | 14 (82)             | 5 (33)                |
| <b>Main admission <i>n</i> (%)</b>               |                  |                     |                       |
| Medical                                          | 15 (100)         | 7 (41)              |                       |
| Surgical                                         | 0 (0)            | 10 (59)             |                       |
| SAPSII score                                     | 34 [26-39]       | 45.5 [38-56]        |                       |
| SOFA score                                       | 3 [1-5]          | 10 [7-12]           |                       |
| Charlson score                                   | 0 [0-1.5]        | 2 [1-6]             |                       |
| <b>Infection diagnosis <i>n</i> (%)</b>          |                  |                     |                       |
| Microbiology                                     | 15 (100)         | 12 (70)             |                       |
| Surgery                                          | 0 (0)            | 3 (18)              |                       |
| Other                                            | 0 (0)            | 2 (12)              |                       |
| <b>Microbiologically documented <i>n</i> (%)</b> |                  |                     |                       |
| Bacilli gram -                                   | 0 (0)            | 7 (64)              |                       |
| Cocci gram +                                     | 0 (0)            | 4 (36)              |                       |
| Sars-CoV-2                                       | 15 (100%)        | 0 (0)               |                       |
| <b>Respiratory dysfunction</b>                   |                  |                     |                       |
| Mechanical ventilation <i>n</i> (%)              | 3 (20)           | 15 (88)             |                       |
| PaO <sub>2</sub> /FiO <sub>2</sub>               | 76.5 [67-93]     | 248 [177-294]       |                       |
| <b>Site of primary infection <i>n</i> (%)</b>    |                  |                     |                       |
| Pulmonary                                        | 15 (100)         | 1 (6)               |                       |
| Abdominal                                        | 0 (0)            | 11 (69)             |                       |
| Other                                            | 0 (0)            | 4 (25)              |                       |
| <b>Follow-up <i>n</i> (%)</b>                    |                  |                     |                       |
| 28-day non survivors                             | 5 (33)           | 4 (27)              |                       |
| Secondary nosocomial infections                  | 1 (7)            | 2 (12)              |                       |
| <b>Immunologic parameters (at Day 3)</b>         |                  |                     |                       |
| mHLA-DR (AB/C)                                   | 7300 [5299-8842] | 5161 [3613-6475]    | 19570 [18146-29700]   |
| Absolute CD4+ T cell count (cells/ $\mu$ L)      | 166 [126-462]    | 343 [174-681]       | 675 [542-734]         |

**Supplementary Table. 1 Demographic, clinical, and immunologic data for viral septic (COVID-19) and bacterial septic shock patients.** Continuous data are presented as medians and interquartile ranges [Q1–Q3]. For clinical parameters, categorical data are presented as numbers of cases and percentages among the total population in brackets. SAPS II (simplified acute physiology score II) and SOFA (sequential organ failure assessment) scores were calculated at admission. Absolute CD4+ T cell count (expressed as cells/ $\mu$ L) was calculated on day 3 as well as mHLA-DR (expressed as numbers of anti-HLA-DR antibodies bound per monocyte, AB/C). Reference values from our routine lab: mHLA-DR: 13500-45000 AB/C, CD4+: 336–1126 cells/ $\mu$ L.
